# Supplementary material for: Reduced charge fluctuations in individual SnO2 nanowires by suppressed surface reactions
Source: Royal Society of Chemistry journal article supplement (doi:10.1039/c2jm35361j), 2012-01-01
Supplement: c2jm35361j.pdf [file c2jm35361j.pdf]

# Supporting Information

## Reduced charge fluctuations in individual SnO<sub>2</sub> nanowires by suppressed surface reactions

**Junghwan Huh,<sup>a,b,§</sup> Min-Kyu Joo,<sup>a,c</sup> Doyoung Jang,<sup>d</sup> Jong-Heun Lee<sup>e</sup> and Gyu Tae Kim<sup>\*a</sup>**

<sup>a</sup> School of Electrical Engineering, Korea University Seoul 136-701, Korea.

<sup>b</sup> Semiconductor Research Institute, Korea University Seoul 136-701, Korea.

<sup>c</sup> IMEP-LAHC, Grenoble INP-MINATEC Grenoble, France.

<sup>d</sup> Center for Opto-Electronic Convergence Systems, Korea Institute of Science and Technology Seoul 136-791, Korea.

<sup>e</sup> Department of Materials Science and Engineering, Korea University Seoul 136-701, Korea.

<sup>§</sup> Present address: Department. of Electronics and Telecommunications, Norwegian University of Science and Technology (NTNU), NO-7491 Trondheim, Norway

E-mail : gtkim@korea.ac.kr

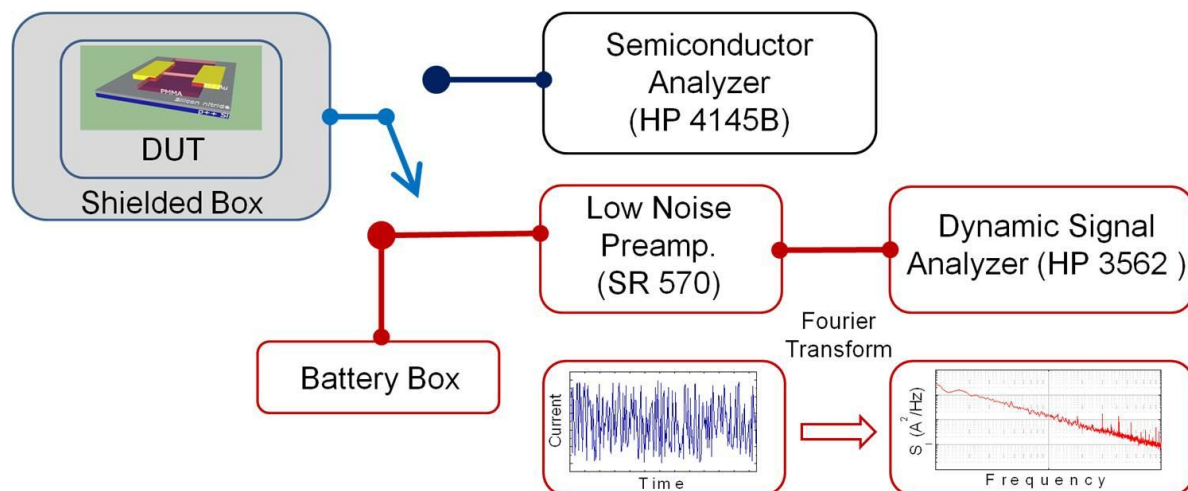

**Figure S1.** Schematic for the DC and low-frequency noise measurement of SnO<sub>2</sub> NW FETs. For the low-frequency noise measurement, the current fluctuations on time can be obtained with power spectral density through the Dynamic Signal Analyzer. Note that the DC batteries are used for the noise measurement to provide low-noise voltage.

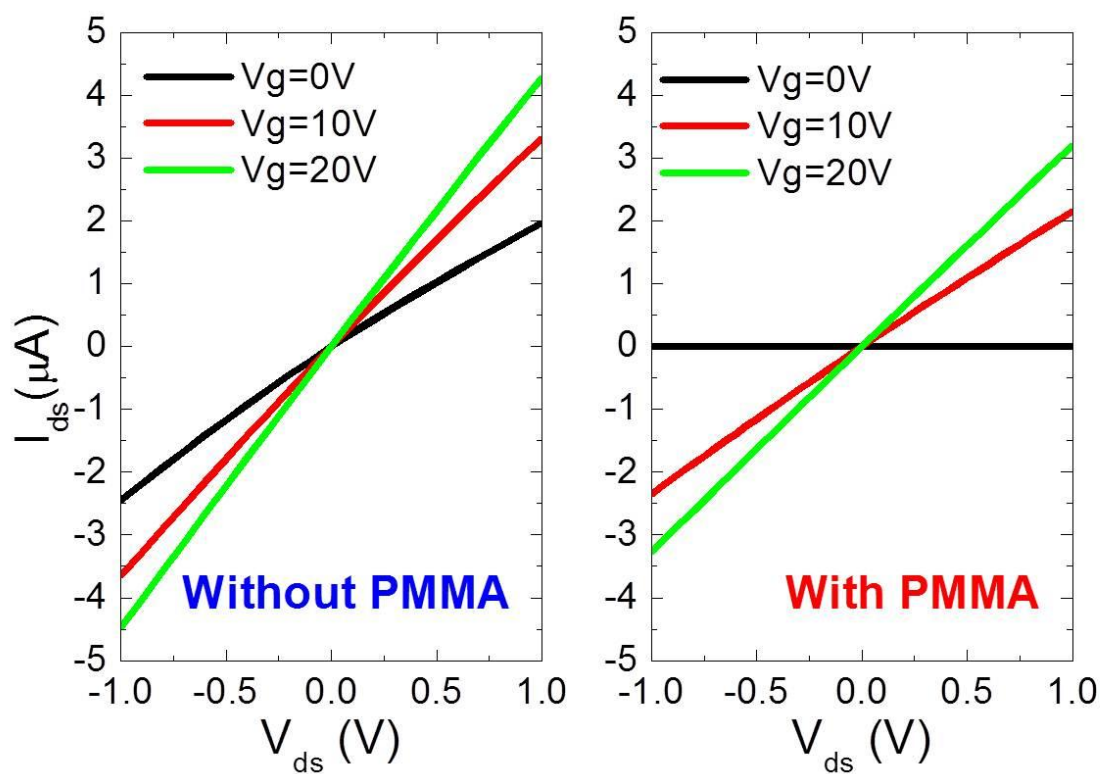

**Figure S2.** Output characteristics as a function of  $V_g$  for  $SnO_2$  NW FET with and without PMMA as a passivation layer for the same device.

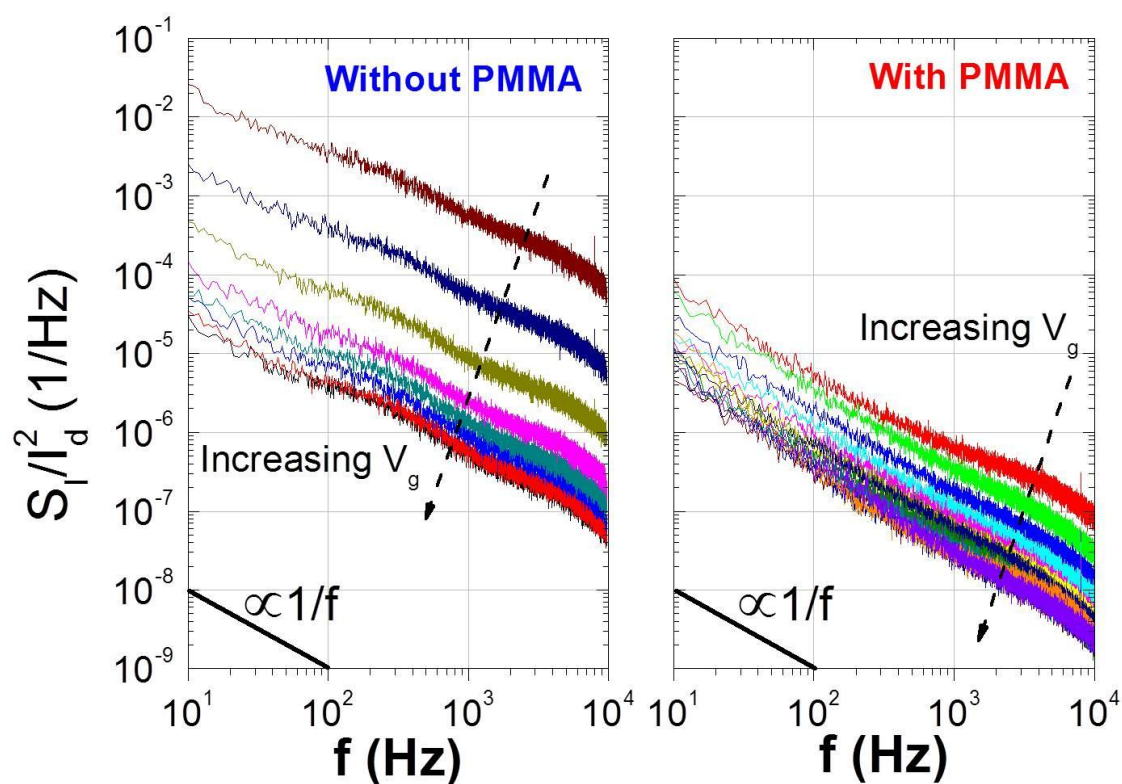

**Figure S3.** Normalized drain current noise power spectra ( $S_I/I_d^2$ ) as a function of the frequency for increasing  $V_g$ . Both of the devices exhibit  $1/f$  noise characteristics regardless of the passivation layer. The solid line indicates the  $1/f$  spectrum.
